# Supplementary material for: Young age increases risk for lymph node positivity in gastric cancer: A Chinese multi-institutional database and US SEER database study
Source: PubMed Central journal article supplement (PMC6959045; doi:10.7150/jca.37531), 2020-01-01
Supplement: jcav11p0678s1.pdf [file jcav11p0678s1.pdf]

## Supplementary Materials

**Table S1. Patient and tumor characteristics by age at diagnosis in China dataset.**

| Characteristic             | No. (%)     | Age at diagnosis, y               |       |       |       |       | P*       |
|----------------------------|-------------|-----------------------------------|-------|-------|-------|-------|----------|
|                            |             | 18-39                             | 40-49 | 50-59 | 60-69 | 70+   |          |
| <b>Age at diagnosis, y</b> | 4905(100%)  | <b>Percent (within age group)</b> |       |       |       |       |          |
| 18-39                      | 479(9.8%)   |                                   |       |       |       |       |          |
| 40-49                      | 768(15.7%)  |                                   |       |       |       |       |          |
| 50-59                      | 1490(30.4%) |                                   |       |       |       |       |          |
| 60-69                      | 1504(30.7%) |                                   |       |       |       |       |          |
| 70+                        | 664(13.5%)  |                                   |       |       |       |       |          |
| <b>Sex</b>                 |             |                                   |       |       |       |       | < 0.0001 |
| Female                     | 1545(31.5%) | 16.2%                             | 19.0% | 27.6% | 25.1% | 12.1% |          |
| Male                       | 3360(68.5%) | 6.8%                              | 14.1% | 31.6% | 33.2% | 14.2% |          |
| <b>T stage</b>             |             |                                   |       |       |       |       | 0.310    |
| T1                         | 905(18.5%)  | 10.7%                             | 17.6% | 28.5% | 31.6% | 11.6% |          |
| T2                         | 486(9.9%)   | 9.3%                              | 15.8% | 31.5% | 30.2% | 13.2% |          |
| T3                         | 628(12.8%)  | 11.1%                             | 12.9% | 29.8% | 31.7% | 14.5% |          |
| T4                         | 2886(58.8%) | 9.3%                              | 15.6% | 30.9% | 30.2% | 14.0% |          |
| <b>Differentiation</b>     |             |                                   |       |       |       |       | < 0.0001 |
| Well                       | 274(5.6%)   | 8.4%                              | 12.4% | 29.9% | 32.1% | 17.2% |          |
| Moderate                   | 1206(24.6%) | 6.0%                              | 12.3% | 31.1% | 34.1% | 16.6% |          |
| poor and undifferentiated  | 3425(69.8%) | 11.2%                             | 17.1% | 30.2% | 29.3% | 12.2% |          |
| <b>Type of gastrectomy</b> |             |                                   |       |       |       |       | 0.776    |
| Total                      | 3231(65.9%) | 9.7%                              | 15.4% | 30.7% | 30.4% | 13.9% |          |
| Subtotal                   | 1674(34.1%) | 9.9%                              | 16.2% | 29.8% | 31.2% | 12.9% |          |

\* Characteristics differ by age group, Chi-square tests.

**Table S2. Patient and tumor characteristics by age at diagnosis in SEER dataset.\***

| Characteristic             | No. (%)      | Age at diagnosis, y        |       |       |       |       |       |
|----------------------------|--------------|----------------------------|-------|-------|-------|-------|-------|
|                            |              | 18-39                      | 40-49 | 50-59 | 60-69 | 70-79 | 80+   |
|                            |              | Percent (within age group) |       |       |       |       |       |
| <b>Age at diagnosis, y</b> | 14877(100%)  |                            |       |       |       |       |       |
| 18-39                      | 416(2.8%)    |                            |       |       |       |       |       |
| 40-49                      | 1176(7.9%)   |                            |       |       |       |       |       |
| 50-59                      | 2446(16.4%)  |                            |       |       |       |       |       |
| 60-69                      | 3654(24.6%)  |                            |       |       |       |       |       |
| 70-79                      | 4313(29.0%)  |                            |       |       |       |       |       |
| 80+                        | 2872(19.3%)  |                            |       |       |       |       |       |
| <b>Race</b>                |              |                            |       |       |       |       |       |
| White                      | 9701(65.2%)  | 2.8%                       | 7.5%  | 15.6% | 24.2% | 29.3% | 20.7% |
| Black                      | 2103(14.1%)  | 2.8%                       | 9.7%  | 19.0% | 27.2% | 27.3% | 14.1% |
| Other                      | 3073(20.7%)  | 2.9%                       | 7.9%  | 17.5% | 23.9% | 29.3% | 18.5% |
| <b>Sex</b>                 |              |                            |       |       |       |       |       |
| Female                     | 5719(38.4%)  | 3.6%                       | 8.6%  | 15.1% | 21.5% | 27.9% | 23.4% |
| Male                       | 9158(61.6%)  | 2.3%                       | 7.5%  | 17.3% | 26.5% | 29.7% | 16.8% |
| <b>T stage</b>             |              |                            |       |       |       |       |       |
| T1                         | 1002(6.7%)   | 1.9%                       | 6.3%  | 15.8% | 27.1% | 32.7% | 16.2% |
| T2                         | 2433(16.4%)  | 2.0%                       | 6.5%  | 15.3% | 24.4% | 30.4% | 21.4% |
| T3                         | 6503(43.7%)  | 2.6%                       | 8.0%  | 16.4% | 24.9% | 28.8% | 19.4% |
| T4                         | 4939(33.2%)  | 3.7%                       | 8.8%  | 17.2% | 23.7% | 27.7% | 18.8% |
| <b>Grade</b>               |              |                            |       |       |       |       |       |
| I                          | 418(2.8%)    | 1.0%                       | 6.5%  | 15.6% | 22.7% | 34.9% | 19.4% |
| II                         | 3560(23.9%)  | 1.3%                       | 4.5%  | 12.8% | 24.5% | 32.9% | 24.0% |
| III                        | 10032(67.4%) | 3.3%                       | 9.0%  | 17.4% | 24.6% | 27.7% | 18.0% |
| IV                         | 407(2.7%)    | 3.7%                       | 9.8%  | 17.2% | 24.1% | 27.3% | 17.9% |
| Unknown                    | 460(3.1%)    | 3.0%                       | 9.8%  | 23.5% | 27.0% | 23.5% | 13.3% |
| <b>Type of gastrectomy</b> |              |                            |       |       |       |       |       |
| Total                      | 3559(23.9%)  | 3.6%                       | 9.7%  | 19.4% | 26.2% | 27.3% | 13.8% |
| Subtotal                   | 11318(76.1%) | 2.5%                       | 7.3%  | 15.5% | 24.1% | 29.5% | 21.0% |

\* Characteristics differ by age group, Chi-square tests; all  $P < .0001$ .

**Table S3. Lymph node positivity and age within T stage groups in SEER dataset.**

| Age, year         | No.  | N1(%)      | N2(%)     | N3a(%)    | N3b(%)    |
|-------------------|------|------------|-----------|-----------|-----------|
| <b>Total</b>      |      |            |           |           |           |
| 18-39             | 416  | 82(19.7)   | 96(23.1)  | 111(26.7) | 41(9.9)   |
| 40-49             | 1176 | 246(20.9)  | 250(21.3) | 266(22.6) | 119(10.1) |
| 50-59             | 2446 | 516(21.1)  | 542(22.2) | 547(22.4) | 207(8.5)  |
| 60-69             | 3654 | 796(21.8)  | 824(22.6) | 709(19.4) | 300(8.2)  |
| 70-79             | 4313 | 1020(23.6) | 896(20.8) | 751(17.4) | 316(7.3)  |
| 80+               | 2872 | 716(24.9)  | 583(20.3) | 465(16.2) | 166(5.8)  |
| <i>P</i> *        |      | 0.361      | <0.0001   | <0.0001   | <0.0001   |
| <b>T stage T1</b> |      |            |           |           |           |
| 18-39             | 19   | 7(36.8)    | 5(26.3)   | 4(21.1)   | 0(0.0)    |
| 40-49             | 63   | 29(46.0)   | 15(23.8)  | 9(14.3)   | 2(3.2)    |
| 50-59             | 158  | 93(58.9)   | 32(20.3)  | 11(7.0)   | 1(0.6)    |
| 60-69             | 272  | 135(49.6)  | 69(25.4)  | 15(5.5)   | 5(1.8)    |
| 70-79             | 328  | 184(56.1)  | 75(22.9)  | 16(4.9)   | 6(1.8)    |
| 80+               | 162  | 96(59.3)   | 35(21.6)  | 15(9.3)   | 3(1.9)    |
| <i>P</i> *        |      | 0.36       | 0.639     | 0.692     | 0.658     |
| <b>T stage T2</b> |      |            |           |           |           |
| 18-39             | 48   | 10(20.8)   | 6(12.5)   | 3(6.3)    | 4(8.3)    |
| 40-49             | 158  | 33(20.9)   | 27(17.1)  | 12(7.6)   | 7(4.4)    |
| 50-59             | 373  | 79(21.2)   | 63(16.9)  | 31(8.3)   | 5(1.3)    |
| 60-69             | 593  | 134(22.6)  | 71(12.0)  | 43(7.3)   | 7(1.2)    |
| 70-79             | 740  | 170(23.0)  | 110(14.9) | 31(4.2)   | 6(0.8)    |
| 80+               | 521  | 134(25.7)  | 47(9.0)   | 34(6.5)   | 3(0.6)    |
| <i>P</i> *        |      | 0.797      | 0.094     | 0.26      | 0.009     |
| <b>T stage T3</b> |      |            |           |           |           |
| 18-39             | 168  | 33(19.6)   | 37(22.0)  | 50(29.8)  | 16(9.5)   |
| 40-49             | 519  | 110(21.2)  | 102(19.7) | 126(24.3) | 43(8.3)   |
| 50-59             | 1066 | 211(19.8)  | 261(24.5) | 244(22.9) | 79(7.4)   |
| 60-69             | 1616 | 347(21.5)  | 386(23.9) | 336(20.8) | 106(6.6)  |
| 70-79             | 1875 | 418(22.3)  | 420(22.4) | 331(17.7) | 105(5.6)  |
| 80+               | 1259 | 284(22.6)  | 279(22.2) | 190(15.1) | 54(4.3)   |
| <i>P</i> *        |      | 0.125      | 0.024     | <0.0001   | <0.0001   |
| <b>T stage T4</b> |      |            |           |           |           |
| 18-39             | 181  | 32(17.7)   | 48(26.5)  | 54(29.8)  | 21(11.6)  |
| 40-49             | 436  | 74(17.0)   | 106(24.3) | 119(27.3) | 67(15.4)  |
| 50-59             | 849  | 133(15.7)  | 186(21.9) | 261(30.7) | 122(14.4) |
| 60-69             | 1173 | 180(15.3)  | 298(25.4) | 315(26.9) | 182(15.5) |
| 70-79             | 1370 | 248(18.1)  | 291(21.2) | 373(27.2) | 199(14.5) |
| 80+               | 930  | 202(21.7)  | 222(23.9) | 226(24.3) | 106(11.4) |
| <i>P</i> *        |      | 0.846      | 0.961     | 0.387     | 0.884     |

\**P*<sub>trend</sub> from Cochran Armitage trend test for lymph node positivity and age within T stage and N stage.

**Table S4. Association of age and LN positivity in SEER dataset.**

| Age, year                       | N1 vs. N0          |      | N2 vs. N0           |      | N3a vs. N0          |      | N3b vs. N0          |      |
|---------------------------------|--------------------|------|---------------------|------|---------------------|------|---------------------|------|
|                                 | HR (95% CI)        | P    | HR (95% CI)         | P    | HR (95% CI)         | P    | HR (95% CI)         | P    |
| <b>Unadjusted</b>               |                    |      |                     |      |                     |      |                     |      |
| <b>T stage T1</b>               |                    |      |                     |      |                     |      |                     |      |
| 18-39                           | 0.830(0.206-3.338) | .793 | 1.159(0.264-5.083)  | .844 | 4.267(0.857-21.245) | .076 | /                   |      |
| 40-49                           | 1.289(0.551-3.013) | .558 | 1.304(0.513-3.318)  | .577 | 3.600(1.181-10.978) | .024 | 2.400(0.396-14.556) | .341 |
| 50-59                           | 1.575(0.884-2.803) | .123 | 1.060(0.547-2.056)  | .863 | 1.676(0.660-4.256)  | .277 | 0.457(0.050-4.156)  | .487 |
| <b>60-69</b>                    | <b>Reference</b>   |      | <b>Reference</b>    |      | <b>Reference</b>    |      | <b>Reference</b>    |      |
| 70-79                           | 1.392(0.879-2.204) | .158 | 1.110(0.661-1.864)  | .693 | 1.089(0.484-2.452)  | .836 | 1.226(0.350-4.291)  | .750 |
| 80+                             | 2.626(1.349-5.112) | .005 | 1.873(0.898-3.908)  | .094 | 3.692(1.439-9.473)  | .007 | 2.215(0.467-10.51)  | .317 |
| <b>T stage T2</b>               |                    |      |                     |      |                     |      |                     |      |
| 18-39                           | 1.009(0.472-2.158) | .982 | 1.143(0.708-2.359)  | .778 | 0.943(0.273-3.256)  | .926 | 7.726(2.118-28.18)  | .002 |
| 40-49                           | 1.054(0.670-1.657) | .821 | 1.627(0.981-2.700)  | .060 | 1.194(0.602-2.369)  | .612 | 4.278(1.459-12.55)  | .008 |
| 50-59                           | 1.022(0.735-1.420) | .897 | 1.538(1.049-2.254)  | .027 | 1.250(0.762-2.049)  | .377 | 1.238(0.388-3.954)  | .718 |
| <b>60-69</b>                    | <b>Reference</b>   |      | <b>Reference</b>    |      | <b>Reference</b>    |      | <b>Reference</b>    |      |
| 70-79                           | 1.014(0.776-1.325) | .921 | 1.238(0.889-1.723)  | .206 | 0.576(0.355-0.934)  | .025 | 0.685(0.228-2.057)  | .500 |
| 80+                             | 1.116(0.839-1.484) | .453 | 0.738(0.495-1.101)  | .137 | 0.882(0.548-1.419)  | .605 | 0.478(0.123-1.865)  | .288 |
| <b>T stage T3</b>               |                    |      |                     |      |                     |      |                     |      |
| 18-39                           | 1.311(0.790-2.174) | .295 | 1.321(0.807-2.162)  | .268 | 2.051(1.287-3.268)  | .003 | 2.080(1.101-3.931)  | .024 |
| 40-49                           | 1.013(0.760-1.350) | .930 | 0.844(0.632-1.129)  | .253 | 1.198(0.906-1.586)  | .205 | 1.296(0.867-1.939)  | .206 |
| 50-59                           | 0.990(0.787-1.243) | .928 | 1.100(0.885-1.368)  | .390 | 1.182(0.945-1.478)  | .144 | 1.213(0.873-1.684)  | .249 |
| <b>60-69</b>                    | <b>Reference</b>   |      | <b>Reference</b>    |      | <b>Reference</b>    |      | <b>Reference</b>    |      |
| 70-79                           | 0.884(0.732-1.067) | .198 | 0.798(0.664-0.961)  | .017 | 0.723(0.595-0.879)  | .001 | 0.727(0.540-0.978)  | .035 |
| 80+                             | 0.799(0.651-0.980) | .031 | 0.705(0.576-0.863)  | .001 | 0.552(0.442-0.688)  | .000 | 0.497(0.349-0.707)  | .000 |
| <b>T stage T4</b>               |                    |      |                     |      |                     |      |                     |      |
| 18-39                           | 1.354(0.777-2.359) | .285 | 1.227(0.737-2.043)  | .432 | 1.305(0.791-2.153)  | .296 | 0.879(0.478-1.616)  | .677 |
| 40-49                           | 1.163(0.792-1.707) | .441 | 1.006(0.708-2.359)  | .973 | 1.069(0.757-1.508)  | .706 | 1.041(0.704-1.539)  | .839 |
| 50-59                           | 0.995(0.730-1.356) | .976 | 0.841(0.635-1.114)  | .227 | 1.116(0.853-1.461)  | .424 | 0.903(0.660-1.235)  | .523 |
| <b>60-69</b>                    | <b>Reference</b>   |      | <b>Reference</b>    |      | <b>Reference</b>    |      | <b>Reference</b>    |      |
| 70-79                           | 1.053(0.807-1.375) | .703 | 0.747(0.584-0.954)  | .020 | 0.905(0.713-1.149)  | .413 | 0.836(0.636-1.099)  | .198 |
| 80+                             | 1.277(0.959-1.700) | .094 | 0.848(0.649-1.108)  | .226 | 0.816(0.626-1.065)  | .135 | 0.663(0.484-0.908)  | .010 |
| <b>Adjusted for covariates*</b> |                    |      |                     |      |                     |      |                     |      |
| <b>T stage T1</b>               |                    |      |                     |      |                     |      |                     |      |
| 18-39                           | 1.279(0.222-7.365) | .783 | 1.872(0.290-12.070) | .510 | 5.339(0.697-40.91)  | .107 | /                   |      |
| 40-49                           | 1.815(0.660-4.997) | .248 | 1.834(0.615-5.465)  | .276 | 4.987(1.402-17.74)  | .013 | 3.824(0.551-28.63)  | .192 |
| 50-59                           | 1.356(0.655-2.809) | .412 | 0.869(0.387-1.950)  | .733 | 1.357(0.469-3.927)  | .573 | 0.412(0.037-4.584)  | .470 |
| <b>60-69</b>                    | <b>Reference</b>   |      | <b>Reference</b>    |      | <b>Reference</b>    |      | <b>Reference</b>    |      |
| 70-79                           | 1.623(0.924-2.851) | .092 | 1.403(0.756-2.602)  | .283 | 1.423(0.588-3.447)  | .434 | 1.544(0.385-6.190)  | .540 |
| 80+                             | 2.189(0.977-4.904) | .057 | 1.948(0.813-4.667)  | .135 | 4.729(1.634-13.69)  | .004 | 4.510(0.779-26.114) | .093 |
| <b>T stage T2</b>               |                    |      |                     |      |                     |      |                     |      |
| 18-39                           | 0.976(0.453-2.102) | .950 | 1.048(0.407-2.697)  | .923 | 0.730(0.206-2.591)  | .626 | 7.390(1.795-30.42)  | .006 |
| 40-49                           | 1.023(0.647-1.616) | .922 | 1.516(0.904-2.542)  | .115 | 1.121(0.554-2.270)  | .751 | 2.599(0.789-8.563)  | .117 |
| 50-59                           | 1.033(0.741-1.439) | .849 | 1.523(1.031-2.250)  | .035 | 1.291(0.775-2.153)  | .327 | 0.960(0.283-3.255)  | .947 |
| <b>60-69</b>                    | <b>Reference</b>   |      | <b>Reference</b>    |      | <b>Reference</b>    |      | <b>Reference</b>    |      |
| 70-79                           | 1.039(0.793-1.362) | .781 | 1.347(0.962-1.886)  | .083 | 0.671(0.409-1.100)  | .114 | 0.709(0.226-2.226)  | .555 |

|                   |                    |       |                    |      |                    |      |                    |      |
|-------------------|--------------------|-------|--------------------|------|--------------------|------|--------------------|------|
| 80+               | 1.178(0.878-1.581) | .275  | 0.949(0.628-1.432) | .802 | 1.298(0.789-2.136) | .304 | 0.882(0.215-3.621) | .861 |
| <b>T stage T3</b> |                    |       |                    |      |                    |      |                    |      |
| 18-39             | 1.294(0.778-2.152) | .321  | 1.255(0.762-2.066) | .372 | 1.821(1.122-2.956) | .015 | 1.701(0.841-3.440) | .139 |
| 40-49             | 0.980(0.734-1.308) | .889  | 0.792(0.590-1.062) | .119 | 1.074(0.801-1.438) | .634 | 1.048(0.667-1.647) | .840 |
| 50-59             | 0.978(0.777-1.231) | .849  | 1.057(0.847-1.319) | .626 | 1.051(0.833-1.327) | .676 | 0.937(0.651-1.349) | .725 |
| <b>60-69</b>      | <b>Reference</b>   |       | <b>Reference</b>   |      | <b>Reference</b>   |      | <b>Reference</b>   |      |
| 70-79             | 0.889(0.736-1.074) | .224  | 0.837(0.693-1.009) | .063 | 0.801(0.654-0.982) | .033 | 0.927(0.667-1.289) | .652 |
| 80+               | 0.810(0.659-0.997) | .047  | 0.769(0.625-0.947) | .013 | 0.666(0.528-0.840) | .001 | 0.806(0.545-1.193) | .281 |
| <b>T stage T4</b> |                    |       |                    |      |                    |      |                    |      |
| 18-39             | 1.361(0.778-2.381) | 0.281 | 1.073(0.640-1.800) | .788 | 0.988(0.587-1.661) | .962 | 0.530(0.269-1.043) | .066 |
| 40-49             | 1.177(0.799-1.733) | 0.410 | 0.935(0.654-1.337) | .712 | 0.908(0.632-1.305) | .603 | 0.839(0.538-1.308) | .439 |
| 50-59             | 0.993(0.727-1.355) | 0.962 | 0.797(0.599-1.061) | .121 | 0.999(0.752-1.328) | .997 | 0.764(0.534-1.094) | .142 |
| <b>60-69</b>      | <b>Reference</b>   |       | <b>Reference</b>   |      | <b>Reference</b>   |      | <b>Reference</b>   |      |
| 70-79             | 1.075(0.821-1.407) | 0.599 | 0.782(0.609-1.004) | .054 | 1.017(0.790-1.309) | .899 | 0.996(0.726-1.367) | .982 |
| 80+               | 1.287(0.961-1.722) | 0.090 | 0.961(0.729-1.266) | .777 | 1.106(0.832-1.470) | .487 | 1.164(0.810-1.674) | .411 |

---

**Table S5. Multivariate logistic analysis of patient and tumor characteristics in T1 stage of China dataset.**

|                                           | N1 vs N0           |       | N2 vs N0           |       | N3a vs N0          |       | N3b vs N0           |       |
|-------------------------------------------|--------------------|-------|--------------------|-------|--------------------|-------|---------------------|-------|
|                                           | OR (95%)           | P     | OR (95%)           | P     | OR (95%)           | P     | OR (95%)            | P     |
| <b>Number of LN examined (continuous)</b> |                    |       |                    |       |                    |       |                     |       |
| Log transformed                           | 0.662(0.330-1.327) | 0.245 | 2.795(1.076-7.260) | 0.035 | 4.966(1.190-20.73) | 0.028 | 292.7(6.815-12573)  | 0.003 |
| <b>Age</b>                                |                    |       |                    |       |                    |       |                     |       |
| 18-39 yrs                                 | 1.008(0.427-2.383) | 0.985 | 3.204(1.395-7.359) | 0.006 | 3.532(1.199-10.41) | 0.022 | 12.039(1.365-106.2) | 0.025 |
| 40-49 yrs                                 | 1.603(0.857-2.999) | 0.139 | 1.608(0.714-3.623) | 0.252 | 1.533(0.521-4.509) | 0.437 | 1.757(0.135-22.80)  | 0.667 |
| 50-59 yrs                                 | 1.086(0.606-1.946) | 0.781 | 1.239(0.594-2.583) | 0.568 | 0.252(0.052-1.224) | 0.087 | 1.441(0.168-12.371) | 0.739 |
| <b>60-69 yrs</b>                          | <b>Reference</b>   |       | <b>Reference</b>   |       | <b>Reference</b>   |       | <b>Reference</b>    |       |
| 70+ yrs                                   | 1.168(0.529-2.580) | 0.701 | 1.737(0.702-4.301) | 0.233 | 2.263(0.667-7.683) | 0.190 | /                   | /     |
| <b>Gender</b>                             |                    |       |                    |       |                    |       |                     |       |
| Male vs Female                            | 0.962(0.601-1.542) | 0.874 | 0.733(0.411-1.305) | 0.291 | 1.241(0.563-2.736) | 0.592 | 0.857(0.152-4.829)  | 0.861 |
| <b>Differentiation</b>                    |                    |       |                    |       |                    |       |                     |       |
| Moderate vs well                          | 1.444(0.579-3.605) | 0.431 | 0.639(0.244-1.673) | 0.362 | 0.908(0.140-5.863) | 0.919 | 0.578(0.040-8.302)  | 0.687 |
| poor and undifferentiated vs well         | 2.320(1.009-5.333) | 0.047 | 1.263(0.569-2.805) | 0.566 | 3.266(0.698-15.28) | 0.133 | 0.518(0.049-5.443)  | 0.583 |
| <b>Type of gastrectomy</b>                |                    |       |                    |       |                    |       |                     |       |
| Subtotal vs Total                         | 0.909(0.532-1.556) | 0.729 | 0.937(0.496-1.771) | 0.842 | 0.874(0.364-2.100) | 0.764 | 0.123(0.021-0.729)  | 0.021 |
| <b>Year of Diagnosis</b>                  |                    |       |                    |       |                    |       |                     |       |
| 2006-07 vs 2004-05                        | 0.593(0.216-1.624) | 0.309 | 0.438(0.147-1.308) | 0.139 | 0.106(0.012-0.895) | 0.039 | 0.922(0.075-11.326) | 0.949 |
| 2008-09 vs 2004-05                        | 0.658(0.306-1.412) | 0.282 | 0.283(0.114-0.708) | 0.007 | 0.118(0.029-0.485) | 0.003 | /                   | /     |
| 2010-11 vs 2004-05                        | 0.641(0.302-1.361) | 0.247 | 0.520(0.239-1.130) | 0.099 | 0.123(0.031-0.486) | 0.003 | 0.271(0.022-3.282)  | 0.305 |
| 2012-14 vs 2004-05                        | 0.464(0.233-0.926) | 0.029 | 0.141(0.062-0.317) | 0.000 | 0.101(0.035-0.290) | 0.000 | 0.033(0.004-0.290)  | 0.002 |

**Table S6. Multivariate logistic analysis of patient and tumor characteristics in T2 stage of China dataset.**

|                                           | N1 vs N0           |          | N2 vs N0            |          | N3a vs N0          |          | N3b vs N0            |          |
|-------------------------------------------|--------------------|----------|---------------------|----------|--------------------|----------|----------------------|----------|
|                                           | OR(95%)            | <i>P</i> | OR(95%)             | <i>P</i> | OR(95%)            | <i>P</i> | OR(95%)              | <i>P</i> |
| <b>Number of LN examined (continuous)</b> |                    |          |                     |          |                    |          |                      |          |
| Log transformed                           | 1.720(0.679-4.355) | 0.252    | 3.750(1.311-10.725) | 0.014    | 4.218(1.146-15.52) | 0.030    | 15.38(0.422-560.2)   | 0.136    |
| <b>Age</b>                                |                    |          |                     |          |                    |          |                      |          |
| 18-39 yrs                                 | 1.829(0.733-4.567) | 0.196    | 1.078(0.371-3.129)  | 0.890    | 1.453(0.449-4.704) | 0.533    | 12.616(2.091-76.134) | 0.006    |
| 40-49 yrs                                 | 0.667(0.297-1.498) | 0.327    | 0.578(0.240-1.393)  | 0.222    | 0.483(0.159-1.474) | 0.201    | 0.000                | 0.998    |
| 50-59 yrs                                 | 0.809(0.418-1.563) | 0.527    | 1.293(0.675-2.475)  | 0.438    | 1.237(0.562-2.723) | 0.597    | 1.193(0.182-7.836)   | 0.854    |
| <b>60-69 yrs</b>                          | <b>Reference</b>   |          | <b>Reference</b>    |          | <b>Reference</b>   |          | <b>Reference</b>     |          |
| 70+ yrs                                   | 1.311(0.622-2.763) | 0.477    | 0.534(0.194-1.464)  | 0.223    | 0.703(0.229-2.161) | 0.539    | 0.000                | 0.998    |
| <b>Gender</b>                             |                    |          |                     |          |                    |          |                      |          |
| Male vs Female                            | 0.905(0.503-1.629) | 0.740    | 1.816(1.018-3.237)  | 0.043    | 2.044(1.048-3.985) | 0.036    | 1.444(0.362-5.763)   | 0.603    |
| <b>Differentiation</b>                    |                    |          |                     |          |                    |          |                      |          |
| Moderate vs well                          | 1.677(0.436-6.446) | 0.452    | 3.075(0.632-14.96)  | 0.164    | 0.564(0.143-2.221) | 0.413    | 0.115(0.008-1.634)   | 0.110    |
| poor and undifferentiated vs well         | 1.734(0.471-6.389) | 0.408    | 2.751(0.587-12.89)  | 0.199    | 1.048(0.312-3.524) | 0.939    | 0.294(0.038-2.241)   | 0.237    |
| <b>Type of gastrectomy</b>                |                    |          |                     |          |                    |          |                      |          |
| Subtotal vs Total                         | 1.453(0.781-2.705) | 0.238    | 2.084(1.030-4.217)  | 0.041    | 1.987(0.858-4.606) | 0.109    | 0.903(0.182-4.483)   | 0.900    |
| <b>Year of Diagnosis</b>                  |                    |          |                     |          |                    |          |                      |          |
| 2006-07 vs 2004-05                        | 0.913(0.223-3.730) | 0.899    | 0.247(0.070-0.874)  | 0.030    | 0.395(0.085-1.838) | 0.237    | 0.765                | 1.000    |
| 2008-09 vs 2004-05                        | 0.999(0.271-3.675) | 0.998    | 0.239(0.078-0.729)  | 0.012    | 0.240(0.056-1.034) | 0.056    | 51950150.525         | 0.000    |
| 2010-11 vs 2004-05                        | 1.345(0.371-4.866) | 0.652    | 0.265(0.087-0.808)  | 0.020    | 0.442(0.112-1.749) | 0.244    | 58662579.093         | 0.000    |
| 2012-14 vs 2004-05                        | 0.657(0.174-2.479) | 0.535    | 0.172(0.056-0.537)  | 0.002    | 0.231(0.055-0.964) | 0.044    | 10148106.883         | 0.000    |

**Table S7. Multivariate logistic analysis of patient and tumor characteristics in T3 stage of China dataset.**

|                                           | N1 vs N0           |          | N2 vs N0           |          | N3a vs N0          |          | N3b vs N0           |          |
|-------------------------------------------|--------------------|----------|--------------------|----------|--------------------|----------|---------------------|----------|
|                                           | OR(95%)            | <i>P</i> | OR(95%)            | <i>P</i> | OR(95%)            | <i>P</i> | OR(95%)             | <i>P</i> |
| <b>Number of LN examined (continuous)</b> |                    |          |                    |          |                    |          |                     |          |
| Log transformed                           | 0.433(0.193-0.969) | 0.042    | 1.660(0.690-3.995) | 0.258    | 1.938(0.712-5.275) | 0.195    | 41.796(8.096-215.8) | 0.000    |
| <b>Age</b>                                |                    |          |                    |          |                    |          |                     |          |
| 18-39 yrs                                 | 1.500(0.618-3.639) | 0.370    | 1.106(0.454-2.695) | 0.825    | 2.550(1.083-6.002) | 0.032    | 3.703(1.299-10.55)  | 0.014    |
| 40-49 yrs                                 | 0.835(0.375-1.861) | 0.659    | 1.222(0.613-2.436) | 0.569    | 0.947(0.406-2.210) | 0.900    | 1.487(0.507-4.360)  | 0.470    |
| 50-59 yrs                                 | 0.916(0.509-1.647) | 0.769    | 0.756(0.433-1.321) | 0.326    | 0.877(0.466-1.650) | 0.684    | 1.227(0.525-2.869)  | 0.637    |
| <b>60-69 yrs</b>                          | <b>Reference</b>   |          | <b>Reference</b>   |          | <b>Reference</b>   |          | <b>Reference</b>    |          |
| 70+ yrs                                   | 0.909(0.446-1.851) | 0.792    | 0.756(0.373-1.533) | 0.438    | 1.078(0.503-2.311) | 0.848    | 1.270(0.419-3.850)  | 0.673    |
| <b>Gender</b>                             |                    |          |                    |          |                    |          |                     |          |
| Male vs Female                            | 1.154(0.683-1.948) | 0.593    | 1.343(0.824-2.190) | 0.236    | 1.327(0.777-2.267) | 0.300    | 1.159(0.576-2.333)  | 0.679    |
| <b>Differentiation</b>                    |                    |          |                    |          |                    |          |                     |          |
| Moderate vs well                          | 0.380(0.084-1.716) | 0.208    | 0.528(0.131-2.131) | 0.369    | 0.372(0.075-1.844) | 0.226    | 0.236(0.048-1.168)  | 0.077    |
| poor and undifferentiated vs well         | 0.755(0.175-3.251) | 0.706    | 0.946(0.242-3.696) | 0.937    | 1.160(0.251-5.361) | 0.849    | 0.682(0.151-3.078)  | 0.619    |
| <b>Type of gastrectomy</b>                |                    |          |                    |          |                    |          |                     |          |
| Subtotal vs Total                         | 1.263(0.742-2.151) | 0.389    | 0.889(0.554-1.427) | 0.626    | 1.154(0.671-1.983) | 0.604    | 0.693(0.361-1.330)  | 0.270    |
| <b>Year of Diagnosis</b>                  |                    |          |                    |          |                    |          |                     |          |
| 2006-07 vs 2004-05                        | 1.347(0.103-17.69) | 0.821    | 0.000              | 0.996    | 999.000            | 0.000    | 21505598.239        | 0.991    |
| 2008-09 vs 2004-05                        | 0.683(0.117-3.984) | 0.672    | 3.521(0.485-25.56) | 0.213    | 999.000            | 0.000    | 1.309               | 1.000    |
| 2010-11 vs 2004-05                        | 2.724(1.040-7.134) | 0.041    | 8.068(1.724-37.77) | 0.008    | 999.000            | 0.000    | 21106556.780        | 0.991    |
| 2012-14 vs 2004-05                        | 1.533(0.582-4.041) | 0.387    | 5.186(1.110-24.23) | 0.036    | 999.000            | 0.000    | 6198545.237         | 0.992    |



**Table S8. Multivariate logistic analysis of patient and tumor characteristics in T4 stage of China dataset.**

|                                           | N1 vs N0           |          | N2 vs N0           |          | N3a vs N0          |          | N3b vs N0          |          |
|-------------------------------------------|--------------------|----------|--------------------|----------|--------------------|----------|--------------------|----------|
|                                           | OR (95%)           | <i>P</i> | OR (95%)           | <i>P</i> | OR (95%)           | <i>P</i> | OR (95%)           | <i>P</i> |
| <b>Number of LN examined (continuous)</b> |                    |          |                    |          |                    |          |                    |          |
| Log transformed                           | 0.692(0.456-1.051) | 0.084    | 0.989(0.669-1.464) | 0.958    | 5.484(3.569-8.425) | 0.000    | 150.6(78.62-288.6) | 0.000    |
| <b>Age</b>                                |                    |          |                    |          |                    |          |                    |          |
| 18-39 yrs                                 | 1.235(0.760-2.009) | 0.394    | 1.215(0.783-1.884) | 0.385    | 1.631(1.066-2.495) | 0.024    | 2.267(1.393-3.690) | 0.001    |
| 40-49 yrs                                 | 1.129(0.782-1.629) | 0.517    | 0.785(0.552-1.117) | 0.179    | 1.146(0.819-1.601) | 0.426    | 1.326(0.885-1.988) | 0.172    |
| 50-59 yrs                                 | 0.999(0.740-1.349) | 0.994    | 0.870(0.660-1.148) | 0.325    | 1.080(0.821-1.419) | 0.583    | 1.160(0.826-1.630) | 0.392    |
| <b>60-69 yrs</b>                          | <b>Reference</b>   |          | <b>Reference</b>   |          | <b>Reference</b>   |          | <b>Reference</b>   |          |
| 70+ yrs                                   | 0.920(0.628-1.349) | 0.670    | 1.149(0.824-1.603) | 0.412    | 0.901(0.631-1.287) | 0.566    | 1.206(0.777-1.872) | 0.404    |
| <b>Gender</b>                             |                    |          |                    |          |                    |          |                    |          |
| Male vs Female                            | 0.734(0.562-0.958) | 0.023    | 0.853(0.671-1.084) | 0.193    | 0.757(0.596-0.960) | 0.022    | 0.965(0.729-1.276) | 0.801    |
| <b>Differentiation</b>                    |                    |          |                    |          |                    |          |                    |          |
| Moderate vs well                          | 1.508(0.823-2.763) | 0.184    | 1.336(0.770-2.318) | 0.303    | 1.305(0.727-2.343) | 0.372    | 1.233(0.560-2.715) | 0.602    |
| poor and undifferentiated vs well         | 1.205(0.675-2.151) | 0.528    | 1.155(0.683-1.952) | 0.591    | 1.783(1.026-3.100) | 0.040    | 2.463(1.168-5.195) | 0.018    |
| <b>Type of gastrectomy</b>                |                    |          |                    |          |                    |          |                    |          |
| Subtotal vs Total                         | 0.855(0.665-1.100) | 0.224    | 0.789(0.627-0.994) | 0.044    | 0.842(0.670-1.057) | 0.138    | 0.560(0.429-0.732) | 0.000    |
| <b>Year of Diagnosis</b>                  |                    |          |                    |          |                    |          |                    |          |
| 2006-07 vs 2004-05                        | 1.287(0.788-2.102) | 0.314    | 1.310(0.828-2.075) | 0.249    | 1.236(0.756-2.020) | 0.397    | 1.051(0.563-1.961) | 0.876    |
| 2008-09 vs 2004-05                        | 0.910(0.605-1.370) | 0.651    | 0.936(0.641-1.368) | 0.733    | 1.069(0.719-1.590) | 0.742    | 0.752(0.452-1.253) | 0.274    |
| 2010-11 vs 2004-05                        | 1.037(0.671-1.602) | 0.871    | 1.060(0.709-1.584) | 0.777    | 1.135(0.746-1.725) | 0.554    | 1.106(0.659-1.856) | 0.702    |
| 2012-14 vs 2004-05                        | 0.810(0.527-1.244) | 0.335    | 0.720(0.483-1.072) | 0.105    | 0.610(0.404-0.922) | 0.019    | 0.337(0.203-0.558) | 0.000    |

**Table S9. Multivariate logistic analysis of patient and tumor characteristics in T1 stage of SEER dataset.**

|                                           | N1 vs N0            |       | N2 vs N0             |       | N3a vs N0             |       | N3b vs N0           |       |
|-------------------------------------------|---------------------|-------|----------------------|-------|-----------------------|-------|---------------------|-------|
|                                           | OR (95%)            | P     | OR (95%)             | P     | OR (95%)              | P     | OR (95%)            | P     |
| <b>Number of LN examined (continuous)</b> |                     |       |                      |       |                       |       |                     |       |
| Log transformed                           | 2.769(1.268-6.047)  | 0.011 | 10.576(4.348-25.726) | 0.000 | 67.782(19.148-239.94) | 0.000 | 6007(292.2-9999)    | 0.000 |
| <b>Age</b>                                |                     |       |                      |       |                       |       |                     |       |
| 18-39 yrs                                 | 1.279(0.222-7.365)  | 0.783 | 1.872(0.290-12.070)  | 0.510 | 5.339(0.697-40.906)   | 0.107 | /                   |       |
| 40-49 yrs                                 | 1.815(0.660-4.997)  | 0.248 | 1.834(0.615-5.465)   | 0.276 | 4.987(1.402-17.739)   | 0.013 | 3.824(0.551-28.63)  | 0.192 |
| 50-59 yrs                                 | 1.356(0.655-2.809)  | 0.412 | 0.869(0.387-1.950)   | 0.733 | 1.357(0.469-3.927)    | 0.573 | 0.412(0.037-4.584)  | 0.470 |
| <b>60-69 yrs</b>                          | <b>Reference</b>    |       | <b>Reference</b>     |       | <b>Reference</b>      |       | <b>Reference</b>    |       |
| 70-79 yrs                                 | 1.623(0.924-2.851)  | 0.092 | 1.403(0.756-2.602)   | 0.283 | 1.423(0.588-3.447)    | 0.434 | 1.544(0.385-6.190)  | 0.540 |
| 80+ yrs                                   | 2.189(0.977-4.904)  | 0.057 | 1.948(0.813-4.667)   | 0.135 | 4.729(1.634-13.687)   | 0.004 | 4.510(0.779-26.114) | 0.093 |
| <b>Race</b>                               |                     |       |                      |       |                       |       |                     |       |
| Black vs White                            | 2.701(1.211-6.024)  | 0.015 | 4.579(1.973-10.628)  | 0.000 | 1.576(0.475-5.226)    | 0.457 | 0.000               | 0.997 |
| Other vs White                            | 2.264(1.257-4.080)  | 0.007 | 1.986(1.040-3.793)   | 0.038 | 1.876(0.840-4.190)    | 0.125 | 1.689(0.441-6.464)  | 0.444 |
| <b>Sex</b>                                |                     |       |                      |       |                       |       |                     |       |
| Male vs Female                            | 1.920(1.163-3.170)  | 0.011 | 1.769(1.024-3.055)   | 0.041 | 1.803(0.898-3.621)    | 0.097 | 3.111(0.963-10.049) | 0.058 |
| <b>Grade</b>                              |                     |       |                      |       |                       |       |                     |       |
| II vs I                                   | 2.586(0.470-14.231) | 0.275 | 3.271(0.527-20.291)  | 0.203 | 2.608(0.270-25.160)   | 0.407 | 7165154.314         | 0.000 |
| III vs I                                  | 0.207(0.044-0.978)  | 0.047 | 0.394(0.074-2.098)   | 0.275 | 0.406(0.049-3.390)    | 0.405 | 8078036.945         |       |
| IV vs I                                   | 0.304(0.042-2.219)  | 0.241 | 0.676(0.076-6.028)   | 0.726 | 0.385(0.016-9.089)    | 0.554 | 0.415               | 1.000 |
| unknown vs I                              | 1.188(0.133-10.600) | 0.878 | 0.646(0.052-8.092)   | 0.735 | 3.394(0.200-57.63)    | 0.398 | 1.674               | 1.000 |
| <b>Type of gastrectomy</b>                |                     |       |                      |       |                       |       |                     |       |
| Subtotal vs Total                         | 2.327(1.298-4.172)  | 0.005 | 3.055(1.581-5.904)   | 0.001 | 3.403(1.417-8.173)    | 0.006 | 5.035(0.922-27.51)  | 0.062 |
| <b>Year of Diagnosis</b>                  |                     |       |                      |       |                       |       |                     |       |
| 2006-07 vs 2004-05                        | 0.875               | 1.000 | 0.754                | 1.000 | 0.812                 | 1.000 | 0.290               | 1.000 |
| 2008-09 vs 2004-05                        | 0.000               | 0.991 | 0.000                | 0.991 | 0.000                 | 0.991 | 0.000               | 0.990 |
| 2010-11 vs 2004-05                        | 0.000               | 0.991 | 0.000                | 0.990 | 0.000                 | 0.991 | 0.000               | 0.991 |
| 2012-14 vs 2004-05                        | 0.969               | 1.000 | 0.651                | 1.000 | 1.008                 | 1.000 | 1.188               | 1.000 |

**Table S10. Multivariate logistic analysis of patient and tumor characteristics in T2 stage of SEER dataset.**

|                                           | N1 vs N0           |       | N2 vs N0           |       | N3a vs N0            |       | N3b vs N0           |       |
|-------------------------------------------|--------------------|-------|--------------------|-------|----------------------|-------|---------------------|-------|
|                                           | OR (95%)           | P     | OR (95%)           | P     | OR (95%)             | P     | OR (95%)            | P     |
| <b>Number of LN examined (continuous)</b> |                    |       |                    |       |                      |       |                     |       |
| Log transformed                           | 1.333(1.003-1.772) | 0.048 | 3.361(2.254-5.012) | 0.000 | 11.138(5.990-20.708) | 0.000 | 518(94.47-2842)     | 0.000 |
| <b>Age</b>                                |                    |       |                    |       |                      |       |                     |       |
| 18-39 yrs                                 | 0.976(0.453-2.102) | 0.950 | 1.048(0.407-2.697) | 0.923 | 0.730(0.206-2.591)   | 0.626 | 7.390(1.795-30.424) | 0.006 |
| 40-49 yrs                                 | 1.023(0.647-1.616) | 0.922 | 1.516(0.904-2.542) | 0.115 | 1.121(0.554-2.270)   | 0.751 | 2.599(0.789-8.563)  | 0.117 |
| 50-59 yrs                                 | 1.033(0.741-1.439) | 0.849 | 1.523(1.031-2.250) | 0.035 | 1.291(0.775-2.153)   | 0.327 | 0.960(0.283-3.255)  | 0.947 |
| <b>60-69 yrs</b>                          | <b>Reference</b>   |       | <b>Reference</b>   |       | <b>Reference</b>     |       | <b>Reference</b>    |       |
| 70-79 yrs                                 | 1.039(0.793-1.362) | 0.781 | 1.347(0.962-1.886) | 0.083 | 0.671(0.409-1.100)   | 0.114 | 0.709(0.226-2.226)  | 0.555 |
| 80+ yrs                                   | 1.178(0.878-1.581) | 0.275 | 0.949(0.628-1.432) | 0.802 | 1.298(0.789-2.136)   | 0.304 | 0.882(0.215-3.621)  | 0.861 |
| <b>Race</b>                               |                    |       |                    |       |                      |       |                     |       |
| Black vs White                            | 1.168(0.871-1.565) | 0.301 | 1.352(0.948-1.927) | 0.096 | 1.629(0.998-2.658)   | 0.051 | 2.727(1.006-7.391)  | 0.049 |
| Other vs White                            | 0.821(0.640-1.053) | 0.121 | 0.807(0.592-1.099) | 0.174 | 0.948(0.630-1.426)   | 0.797 | 0.945(0.379-2.354)  | 0.903 |
| <b>Sex</b>                                |                    |       |                    |       |                      |       |                     |       |
| Male vs Female                            | 0.993(0.807-1.221) | 0.944 | 0.967(0.746-1.254) | 0.802 | 1.153(0.812-1.639)   | 0.426 | 1.301(0.596-2.840)  | 0.508 |
| <b>Grade</b>                              |                    |       |                    |       |                      |       |                     |       |
| II vs I                                   | 1.271(0.795-2.034) | 0.317 | 2.216(0.989-4.967) | 0.053 | 2.781(0.650-11.894)  | 0.168 | 0.697(0.073-6.638)  | 0.754 |
| III vs I                                  | 1.623(1.024-2.572) | 0.039 | 3.568(1.615-7.885) | 0.002 | 6.141(1.473-25.363)  | 0.013 | 1.742(0.207-14.648) | 0.610 |
| IV vs I                                   | 1.006(0.437-2.318) | 0.988 | 1.275(0.347-4.690) | 0.715 | 3.894(0.666-22.780)  | 0.131 | 4.672(0.394-55.351) | 0.222 |
| unknown vs I                              | 0.967(0.444-2.109) | 0.934 | 2.904(1.039-8.116) | 0.042 | 2.850(0.629-1.363)   | 0.267 | 2.954(0.210-41.530) | 0.422 |
| <b>Type of gastrectomy</b>                |                    |       |                    |       |                      |       |                     |       |
| Subtotal vs Total                         | 1.270(0.962-1.677) | 0.091 | 0.979(0.715-1.340) | 0.893 | 1.324(0.834-2.102)   | 0.234 | 0.871(0.360-2.108)  | 0.760 |
| <b>Year of Diagnosis</b>                  |                    |       |                    |       |                      |       |                     |       |
| 2006-07 vs 2004-05                        | 0.914(0.659-1.266) | 0.587 | 0.982(0.658-1.467) | 0.931 | 0.931(0.525-1.649)   | 0.806 | 1.822(0.358-9.278)  | 0.470 |
| 2008-09 vs 2004-05                        | 0.952(0.685-1.323) | 0.770 | 0.916(0.605-1.386) | 0.678 | 1.195(0.684-2.088)   | 0.530 | 0.539(0.069-4.198)  | 0.555 |
| 2010-11 vs 2004-05                        | 0.920(0.682-1.243) | 0.588 | 0.883(0.606-1.287) | 0.519 | 0.837(0.488-1.436)   | 0.517 | 2.308(0.491-10.841) | 0.289 |
| 2012-14 vs 2004-05                        | 0.929(0.679-1.271) | 0.644 | 0.916(0.613-1.368) | 0.668 | 0.931(0.516-1.678)   | 0.811 | 3.473(0.691-17.463) | 0.131 |

**Table S11. Multivariate logistic analysis of patient and tumor characteristics in T3 stage of SEER dataset.**

|                                           | N1 vs N0           |       | N2 vs N0           |       | N3a vs N0            |       | N3b vs N0            |       |
|-------------------------------------------|--------------------|-------|--------------------|-------|----------------------|-------|----------------------|-------|
|                                           | OR(95%)            | P     | OR(95%)            | P     | OR(95%)              | P     | OR(95%)              | P     |
| <b>Number of LN examined (continuous)</b> |                    |       |                    |       |                      |       |                      |       |
| Log transformed                           | 0.929(0.758-1.139) | 0.479 | 2.738(2.189-3.425) | 0.000 | 11.712(8.880-15.449) | 0.000 | 908(511-1614)        | 0.000 |
| <b>Age</b>                                |                    |       |                    |       |                      |       |                      |       |
| 18-39 yrs                                 | 1.294(0.778-2.152) | 0.321 | 1.255(0.762-2.066) | 0.372 | 1.821(1.122-2.956)   | 0.015 | 1.701(0.841-3.440)   | 0.139 |
| 40-49 yrs                                 | 0.980(0.734-1.308) | 0.889 | 0.792(0.590-1.062) | 0.119 | 1.074(0.801-1.438)   | 0.634 | 1.048(0.667-1.647)   | 0.840 |
| 50-59 yrs                                 | 0.978(0.777-1.231) | 0.849 | 1.057(0.847-1.319) | 0.626 | 1.051(0.833-1.327)   | 0.676 | 0.937(0.651-1.349)   | 0.725 |
| <b>60-69 yrs</b>                          | <b>Reference</b>   |       | <b>Reference</b>   |       | <b>Reference</b>     |       | <b>Reference</b>     |       |
| 70-79 yrs                                 | 0.889(0.736-1.074) | 0.224 | 0.837(0.693-1.009) | 0.063 | 0.801(0.654-0.982)   | 0.033 | 0.927(0.667-1.289)   | 0.652 |
| 80+ yrs                                   | 0.810(0.659-0.997) | 0.047 | 0.769(0.625-0.947) | 0.013 | 0.666(0.528-0.840)   | 0.001 | 0.806(0.545-1.193)   | 0.281 |
| <b>Race</b>                               |                    |       |                    |       |                      |       |                      |       |
| Black vs White                            | 1.164(0.955-1.418) | 0.134 | 1.134(0.932-1.381) | 0.210 | 1.001(0.804-1.246)   | 0.993 | 1.117(0.788-1.584)   | 0.534 |
| Other vs White                            | 1.116(0.930-1.338) | 0.239 | 0.900(0.748-1.083) | 0.265 | 1.063(0.878-1.286)   | 0.531 | 1.114(0.830-1.496)   | 0.472 |
| <b>Sex</b>                                |                    |       |                    |       |                      |       |                      |       |
| Male vs Female                            | 0.889(0.769-1.027) | 0.110 | 0.875(0.757-1.011) | 0.069 | 0.878(0.752-1.026)   | 0.101 | 0.983(0.766-1.261)   | 0.890 |
| <b>Grade</b>                              |                    |       |                    |       |                      |       |                      |       |
| II vs I                                   | 1.183(0.799-1.753) | 0.401 | 2.144(1.318-3.486) | 0.002 | 1.424(0.838-2.420)   | 0.191 | 2.748(0.616-12.256)  | 0.185 |
| III vs I                                  | 1.439(0.982-2.109) | 0.062 | 3.066(1.904-4.938) | 0.000 | 3.181(1.902-5.318)   | 0.000 | 11.060(2.551-47.954) | 0.001 |
| IV vs I                                   | 1.321(0.756-2.306) | 0.328 | 2.875(1.551-5.330) | 0.001 | 2.896(1.499-5.593)   | 0.002 | 7.797(1.504-40.416)  | 0.014 |
| unknown vs I                              | 1.453(0.848-2.488) | 0.174 | 2.111(1.121-3.975) | 0.021 | 2.101(1.062-4.154)   | 0.033 | 12.454(2.519-61.58)  | 0.002 |
| <b>Type of gastrectomy</b>                |                    |       |                    |       |                      |       |                      |       |
| Subtotal vs Total                         | 0.925(0.780-1.098) | 0.374 | 0.985(0.832-1.165) | 0.856 | 0.899(0.755-1.070)   | 0.230 | 0.641(0.497-0.826)   | 0.001 |
| <b>Year of Diagnosis</b>                  |                    |       |                    |       |                      |       |                      |       |
| 2006-07 vs 2004-05                        | 0.995(0.790-1.253) | 0.964 | 0.824(0.657-1.033) | 0.093 | 0.856(0.673-1.088)   | 0.204 | 0.717(0.490-1.048)   | 0.085 |
| 2008-09 vs 2004-05                        | 0.982(0.784-1.230) | 0.874 | 0.749(0.600-0.935) | 0.011 | 0.676(0.533-0.859)   | 0.001 | 0.548(0.376-0.798)   | 0.002 |
| 2010-11 vs 2004-05                        | 0.842(0.679-1.045) | 0.119 | 0.662(0.536-0.817) | 0.000 | 0.560(0.445-0.703)   | 0.000 | 0.378(0.263-0.545)   | 0.000 |
| 2012-14 vs 2004-05                        | 1.253(1.001-1.568) | 0.049 | 1.141(0.916-1.422) | 0.240 | 1.161(0.916-1.472)   | 0.217 | 0.926(0.629-1.363)   | 0.695 |

**Table S12. Multivariate logistic analysis of patient and tumor characteristics in T4 stage of SEER dataset.**

|                                           | N1 vs N0           |          | N2 vs N0           |          | N3a vs N0             |          | N3b vs N0            |          |
|-------------------------------------------|--------------------|----------|--------------------|----------|-----------------------|----------|----------------------|----------|
|                                           | OR (95%)           | <i>P</i> | OR (95%)           | <i>P</i> | OR (95%)              | <i>P</i> | OR (95%)             | <i>P</i> |
| <b>Number of LN examined (continuous)</b> |                    |          |                    |          |                       |          |                      |          |
| Log transformed                           | 0.895(0.689-1.162) | 0.406    | 2.986(2.274-3.921) | 0.000    | 20.490(14.828-28.314) | 0.000    | 1876(1083-3249)      | 0.000    |
| <b>Age</b>                                |                    |          |                    |          |                       |          |                      |          |
| 18-39 yrs                                 | 1.361(0.778-2.381) | 0.281    | 1.073(0.640-1.800) | 0.788    | 0.988(0.587-1.661)    | 0.962    | 0.530(0.269-1.043)   | 0.066    |
| 40-49 yrs                                 | 1.177(0.799-1.733) | 0.410    | 0.935(0.654-1.337) | 0.712    | 0.908(0.632-1.305)    | 0.603    | 0.839(0.538-1.308)   | 0.439    |
| 50-59 yrs                                 | 0.993(0.727-1.355) | 0.962    | 0.797(0.599-1.061) | 0.121    | 0.999(0.752-1.328)    | 0.997    | 0.764(0.534-1.094)   | 0.142    |
| <b>60-69 yrs</b>                          | <b>Reference</b>   |          | <b>Reference</b>   |          | <b>Reference</b>      |          | <b>Reference</b>     |          |
| 70-79 yrs                                 | 1.075(0.821-1.407) | 0.599    | 0.782(0.609-1.004) | 0.054    | 1.017(0.790-1.309)    | 0.899    | 0.996(0.726-1.367)   | 0.982    |
| 80+ yrs                                   | 1.287(0.961-1.722) | 0.090    | 0.961(0.729-1.266) | 0.777    | 1.106(0.832-1.470)    | 0.487    | 1.164(0.810-1.674)   | 0.411    |
| <b>Race</b>                               |                    |          |                    |          |                       |          |                      |          |
| Black vs White                            | 1.422(1.075-1.881) | 0.014    | 1.404(1.070-1.842) | 0.014    | 1.417(1.074-1.869)    | 0.014    | 1.150(0.800-1.652)   | 0.451    |
| Other vs White                            | 0.909(0.707-1.168) | 0.454    | 1.133(0.902-1.423) | 0.282    | 1.170(0.933-1.476)    | 0.175    | 1.056(0.797-1.400)   | 0.705    |
| <b>Sex</b>                                |                    |          |                    |          |                       |          |                      |          |
| Male vs Female                            | 0.945(0.779-1.148) | 0.570    | 0.879(0.731-1.056) | 0.168    | 0.832(0.692-1.001)    | 0.051    | 0.852(0.675-1.076)   | 0.180    |
| <b>Grade</b>                              |                    |          |                    |          |                       |          |                      |          |
| II vs I                                   | 1.232(0.694-2.186) | 0.477    | 1.719(0.917-3.220) | 0.091    | 3.535(1.407-8.879)    | 0.007    | 2.729(0.587-12.678)  | 0.200    |
| III vs I                                  | 1.672(0.965-2.897) | 0.067    | 2.951(1.609-5.412) | 0.000    | 9.599(3.893-23.669)   | 0.000    | 12.346(2.736-55.697) | 0.001    |
| IV vs I                                   | 0.747(0.327-1.704) | 0.488    | 2.198(0.999-4.837) | 0.050    | 8.150(2.913-22.805)   | 0.000    | 21.946(4.380-109.97) | 0.000    |
| unknown vs I                              | 1.441(0.712-2.919) | 0.310    | 1.772(0.827-3.798) | 0.141    | 7.395(2.709-20.189)   | 0.000    | 8.770(1.723-44.646)  | 0.009    |
| <b>Type of gastrectomy</b>                |                    |          |                    |          |                       |          |                      |          |
| Subtotal vs Total                         | 1.173(0.934-1.473) | 0.169    | 1.262(1.020-1.562) | 0.032    | 0.940(0.766-1.153)    | 0.552    | 0.737(0.576-0.944)   | 0.016    |
| <b>Year of Diagnosis</b>                  |                    |          |                    |          |                       |          |                      |          |
| 2006-07 vs 2004-05                        | 0.762(0.570-1.018) | 0.066    | 0.770(0.582-1.018) | 0.067    | 0.701(0.530-0.929)    | 0.013    | 0.950(0.659-1.369)   | 0.782    |
| 2008-09 vs 2004-05                        | 0.893(0.649-1.229) | 0.488    | 0.916(0.675-1.244) | 0.575    | 0.800(0.589-1.087)    | 0.154    | 0.954(0.645-1.412)   | 0.816    |
| 2010-11 vs 2004-05                        | 0.828(0.619-1.106) | 0.201    | 0.892(0.676-1.176) | 0.417    | 0.738(0.559-0.973)    | 0.031    | 0.734(0.513-1.050)   | 0.091    |
| 2012-14 vs 2004-05                        | 0.880(0.660-1.175) | 0.386    | 1.144(0.869-1.506) | 0.338    | 1.123(0.850-1.483)    | 0.415    | 1.395(0.967-2.011)   | 0.075    |

**Table S13. Rate ratio estimates from multivariable Poisson model for number of positive LN in China dataset.**

|                                           | Final Stage = T1    |          | Final Stage = T2    |          | Final Stage = T3    |          | Final Stage = T4    |          |
|-------------------------------------------|---------------------|----------|---------------------|----------|---------------------|----------|---------------------|----------|
|                                           | Rate Ratio (95%)    | <i>P</i> | Rate Ratio (95%)    | <i>P</i> | Rate Ratio (95%)    | <i>P</i> | Rate Ratio (95%)    | <i>P</i> |
| <b>Age</b>                                |                     |          |                     |          |                     |          |                     |          |
| <b>Ref group is ages 60-69</b>            |                     |          |                     |          |                     |          |                     |          |
| 18-39 yrs                                 | 2.979 (2.484-3.572) | <0.0001  | 1.850 (1.555-2.200) | <0.0001  | 1.662 (1.494-1.849) | <0.0001  | 1.341 (1.278-1.407) | <0.0001  |
| 40-49 yrs                                 | 1.317 (1.084-1.602) | 0.006    | 0.556 (0.448-0.693) | <0.0001  | 0.973 (0.860-1.102) | 0.667    | 1.132 (1.085-1.180) | <0.0001  |
| 50-59 yrs                                 | 0.818 (0.674-0.993) | 0.042    | 0.977 (0.841-1.134) | 0.758    | 1.058 (0.964-1.134) | 0.233    | 1.143 (1.104-1.184) | <0.0001  |
| <b>60-69 yrs</b>                          | <b>Reference</b>    |          | <b>Reference</b>    |          | <b>Reference</b>    |          | <b>Reference</b>    |          |
| 70+ yrs                                   | 0.958 (0.746-1.230) | 0.737    | 0.639 (0.512-0.798) | <0.0001  | 1.015 (0.898-1.147) | 0.809    | 1.100 (1.050-1.152) | <0.0001  |
| <b>Number of LN examined (continuous)</b> |                     |          |                     |          |                     |          |                     |          |
| Log transformed                           | 5.056 (3.953-6.466) | <0.0001  | 3.028 (2.367-3.874) | <0.001   | 5.483 (4.655-6.459) | <0.0001  | 7.582 (7.155-8.034) | <0.0001  |
| <b>Year of Diagnosis</b>                  |                     |          |                     |          |                     |          |                     |          |
| 2006-07 vs 2004-05                        | 0.453 (0.345-0.594) | 0.041    | 0.606 (0.451-0.812) | 0.0008   | 6.115 (3.741-9.994) | <0.0001  | 0.940 (0.886-0.997) | 0.041    |
| 2008-09 vs 2004-05                        | 0.237 (0.184-0.304) | <0.0001  | 0.670 (0.520-0.863) | 0.0019   | 3.971 (2.519-6.257) | <0.0001  | 0.829 (0.788-0.871) | <0.0001  |
| 2010-11 vs 2004-05                        | 0.384 (0.314-0.470) | <0.0001  | 0.648 (0.504-0.833) | 0.0007   | 5.600 (3.731-8.405) | <0.0001  | 0.901 (0.857-0.948) | <0.0001  |
| 2012-14 vs 2004-05                        | 0.180 (0.151-0.214) | <0.0001  | 0.434 (0.334-0.564) | <0.001   | 3.584 (2.385-5.388) | <0.0001  | 0.629 (0.599-0.661) | <0.0001  |
| <b>Sex (Male vs Female)</b>               | 1.043 (0.910-1.196) | 0.546    | 0.690 (0.611-0.779) | <0.0001  | 0.965 (0.894-1.042) | 0.361    | 0.954 (0.926-0.982) | 0.0013   |
| <b>Grade</b>                              |                     |          |                     |          |                     |          |                     |          |
| II vs I                                   | 0.731 (0.561-0.953) | 0.02     | 0.668 (0.516-0.866) | 0.002    | 0.446 (0.375-0.529) | <0.0001  | 1.033 (0.949-1.123) | 0.453    |
| III/IV/unknown vs I                       | 1.246 (1.000-1.552) | 0.05     | 0.894 (0.706-1.132) | 0.353    | 0.750 (0.641-0.876) | 0.0003   | 1.338 (1.235-1.449) | <0.0001  |
| <b>Type of gastrectomy</b>                |                     |          |                     |          |                     |          |                     |          |
| Subtotal vs Total                         | 0.592 (0.513-0.682) | <0.0001  | 1.332 (1.146-1.547) | 0.0002   | 0.944 (0.876-1.017) | 0.129    | 0.830 (0.808-0.853) | <0.0001  |

**Table S14. Rate ratio estimates from a single multivariable Poisson model for number of positive LN for stage T1 in SEER dataset.**

|                                           | Final Stage = T1    |         |
|-------------------------------------------|---------------------|---------|
|                                           | Rate Ratio (95%)    | P       |
| <b>Age - Race</b>                         |                     |         |
| <b>Ref group is White, ages 60-69</b>     |                     |         |
| <b>White</b>                              |                     |         |
| 18-39 yrs                                 | 1.341 (1.010-1.782) | 0.043   |
| 40-49 yrs                                 | 1.050 (0.845-1.304) | 0.661   |
| 50-59 yrs                                 | 0.895 (0.759-1.054) | 0.184   |
| <b>60-69 yrs</b>                          |                     |         |
| 70-79 yrs                                 | 1.032 (0.913-1.168) | 0.612   |
| 80+ yrs                                   | 1.515 (1.318-1.743) | <0.001  |
| <b>Black</b>                              |                     |         |
| 20-39 yrs                                 | 0.582 (0.185-1.829) | 0.354   |
| 40-49 yrs                                 | 2.029 (1.496-2.753) | <0.001  |
| 50-59 yrs                                 | 0.646 (0.484-0.861) | 0.003   |
| 60-69 yrs                                 | 1.144 (0.910-1.439) | 0.248   |
| 70-79 yrs                                 | 1.022 (0.806-1.296) | 0.859   |
| 80+ yrs                                   |                     |         |
| <b>Other</b>                              |                     |         |
| 20-39 yrs                                 | 0.971 (0.569-1.655) | 0.912   |
| 40-49 yrs                                 | 1.644 (1.303-2.076) | <0.001  |
| 50-59 yrs                                 | 1.185 (0.968-1.452) | 0.101   |
| 60-69 yrs                                 | 1.029 (0.854-1.239) | 0.763   |
| 70-79 yrs                                 | 1.025 (0.869-1.209) | 0.768   |
| 80+ yrs                                   | 0.929 (0.739-1.168) | 0.528   |
| <b>Number of LN examined (continuous)</b> |                     |         |
| Log transformed                           | 4.091 (3.572-4.686) | <0.0001 |
| <b>Year of Diagnosis</b>                  |                     |         |
| 2006-07 vs 2004-05                        | 0.845 (0.744-0.960) | 0.010   |
| 2008-09 vs 2004-05                        | 0.567 (0.499-0.651) | <0.0001 |
| 2010-11 vs 2004-05                        | 0.642 (0.570-0.724) | <0.0001 |
| 2012-14 vs 2004-05                        | 0.984 (0.869-1.116) | 0.807   |
| <b>Sex (Male vs Female)</b>               | 0.899 (0.831-0.973) | 0.008   |
| <b>Grade</b>                              |                     |         |
| II vs I                                   | 1.053 (0.843-1.316) | 0.649   |
| III/IV/unknown vs I                       | 1.235 (0.995-1.533) | 0.056   |
| <b>Type of gastrectomy</b>                |                     |         |
| Subtotal vs Total                         | 1.236 (1.109-1.377) | 0.0001  |

**Table S15. Rate ratio estimates from multivariable Poisson model for number of positive LN in SEER dataset.**

|                                           | Final Stage = T2    |         | Final Stage=T3      |         | Final Stage=T4      |         |
|-------------------------------------------|---------------------|---------|---------------------|---------|---------------------|---------|
|                                           | Rate Ratio (95%)    | P       | Rate Ratio (95%)    | P       | Rate Ratio (95%)    | P       |
| <b>Age</b>                                |                     |         |                     |         |                     |         |
| <b>Ref group is ages 60-69</b>            |                     |         |                     |         |                     |         |
| 18-39 yrs                                 | 1.771 (1.073-2.923) | 0.025   | 1.111 (1.042-1.185) | 0.0013  | 1.239 (1.161-1.323) | <0.0001 |
| 40-49 yrs                                 | 1.250 (0.920-1.698) | 0.153   | 0.972 (0.931-1.015) | 0.202   | 1.225 (1.152-1.302) | <0.0001 |
| 50-59 yrs                                 | 1.096 (0.872-1.377) | 0.434   | 0.989 (0.956-1.022) | 0.504   | 1.276 (1.202-1.354) | <0.0001 |
| <b>60-69 yrs</b>                          | <b>Reference</b>    |         | <b>Reference</b>    |         | <b>Reference</b>    |         |
| 70-79 yrs                                 | 0.645 (0.517-0.806) | 0.0001  | 0.949 (0.920-0.979) | 0.001   | 1.296 (1.222-1.376) | <0.0001 |
| 80+ yrs                                   | 0.976 (0.780-1.221) | 0.83    | 0.903 (0.871-0.937) | <0.0001 | 1.293 (1.215-1.375) | <0.0001 |
| <b>Number of LN examined (continuous)</b> |                     |         |                     |         |                     |         |
| Log transformed                           | 1.225 (0.990-1.514) | 0.061   | 6.338 (6.079-6.608) | <0.0001 | 7.509 (7.225-7.805) | <0.0001 |
| <b>Race</b>                               |                     |         |                     |         |                     |         |
| Black vs White                            | 1.813 (1.218-2.696) | 0.003   | 1.008 (0.975-1.041) | 0.652   | 0.990 (0.959-1.022) | 0.550   |
| Other vs White                            | 1.791 (1.397-2.295) | <0.0001 | 1.042 (1.013-1.072) | 0.004   | 1.028 (1.003-1.054) | 0.028   |
| <b>Year of Diagnosis</b>                  |                     |         |                     |         |                     |         |
| 2006-07 vs 2004-05                        | 1.509 (1.199-1.898) | 0.0004  | 0.889 (0.857-0.921) | <0.0001 | 1.006 (0.973-1.040) | 0.725   |
| 2008-09 vs 2004-05                        | 0.890 (0.719-1.102) | 0.286   | 0.827 (0.798-0.857) | <0.0001 | 0.969 (0.936-1.003) | 0.076   |
| 2010-11 vs 2004-05                        | 1.112 (0.890-1.375) | 0.325   | 0.746 (0.721-0.772) | <0.0001 | 0.913 (0.885-0.943) | <0.0001 |
| 2012-14 vs 2004-05                        | 0.970 (0.784-1.199) | 0.779   | 0.983 (0.950-1.018) | 0.348   | 1.097 (1.062-1.132) | <0.0001 |
| <b>Sex (Male vs Female)</b>               | 2.500 (1.825-3.425) | <0.0001 | 1.007 (0.983-1.031) | 0.581   | 1.022 (1.001-1.044) | 0.040   |
| <b>Grade</b>                              |                     |         |                     |         |                     |         |
| II vs I                                   | 1.184 (0.823-1.703) | 0.362   | 1.322 (1.192-1.466) | <0.0001 | 1.603 (1.389-1.850) | <0.0001 |
| III/IV/unk vs I                           | 1.127 (0.876-1.450) | 0.351   | 1.992 (1.801-2.203) | <0.0001 | 2.311 (2.009-2.659) | <0.0001 |
| <b>Type of gastrectomy</b>                |                     |         |                     |         |                     |         |
| Subtotal vs Total                         | 0.956 (0.771-1.186) | 0.681   | 0.885 (0.864-0.908) | <0.0001 | 0.859 (0.841-0.878) | <0.0001 |
